# Supplementary material for: Two-dimensional Janus monolayers Al2XYZ (X/Y/Z = S, Se, Te, X ≠ Y ≠ Z): first-principles insight into the photocatalytic and highly adjustable piezoelectric properties
Source: Royal Society of Chemistry journal article supplement (doi:10.1039/d2tc04939b), 2023-01-01
Supplement: d2tc04939b1.pdf [file d2tc04939b1.pdf]

## Two-Dimensional Janus Monolayers $Al_2XYZ$ ( $X/Y/Z = S, Se, Te$ , $X \neq Y \neq Z$ ): First-principles Insight onto the Photocatalytic and Highly Adjustable Piezoelectric Properties

Chenchen Qi<sup>a</sup>, Cuixia Yan<sup>a\*</sup>(Equal contribution), Qiuyang Li<sup>a</sup>, Ting

Yang<sup>a</sup>, Shi Qiu<sup>a</sup>, Jinming Cai<sup>a</sup>

a. Faculty of Materials Science and Engineering, Kunming University of  
Science and Technology, Kunming, 650093, People's Republic of China

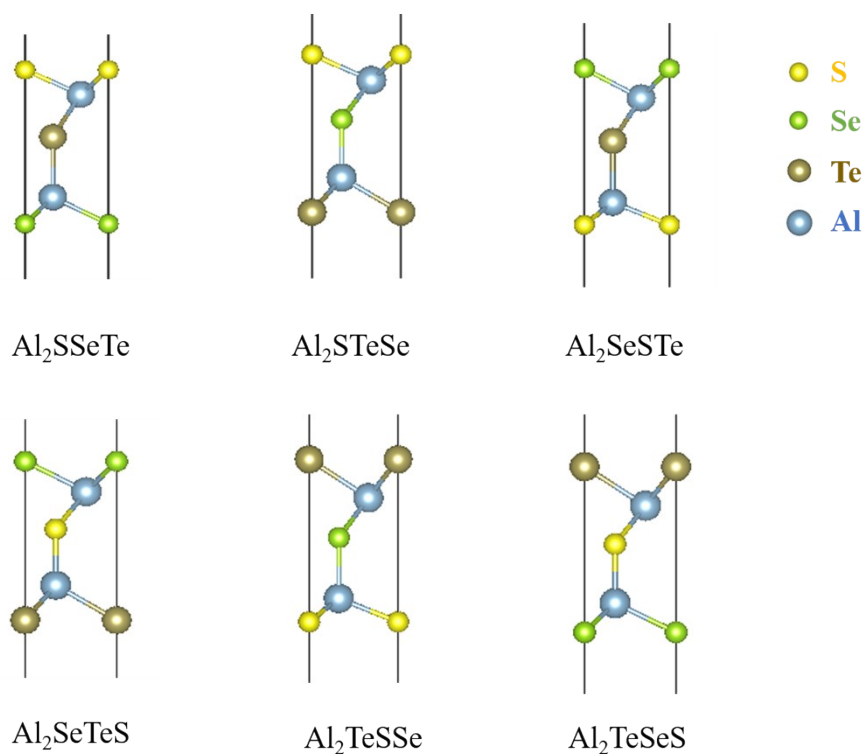

**Figure S1.** Six models of  $Al_2XYZ$  ( $X/Y/Z = S, Se, Te, X \neq Y \neq Z$ ) monolayers ( $Al_2SSeTe$ ,  $Al_2STeSe$ ,  $Al_2SeSTe$ ,  $Al_2SeTeS$ ,  $Al_2TeSSe$ , and  $Al_2TeSeS$ ). Dark blue, yellow, green and brown balls refer to the Al, S, Se and Te atoms, respectively.



**Figure S3.** The corresponding ELF of  $Al_2SSeTe$ ,  $Al_2STeSe$ ,  $Al_2SeSTe$ ,  $Al_2TeSSe$ , and  $Al_2TeSeS$  monolayers. (The values of vertical bar represent the localized level of electrons. The values of 0.0, 0.5 and 1.0 represent fully delocalized, electron-gas-like pair probability and entirely localized electrons, respectively.)

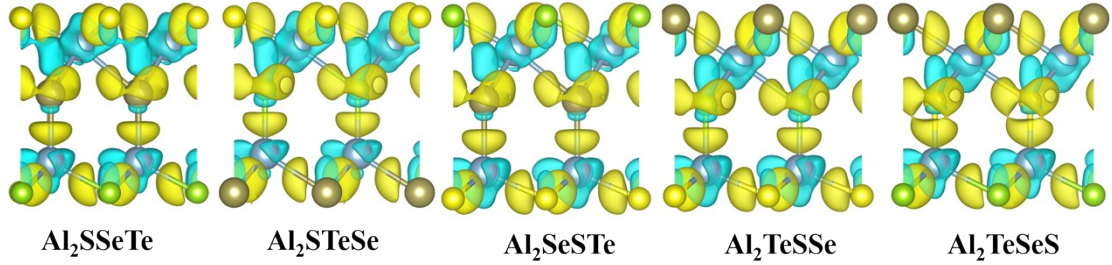

**Figure S4.** Charge density differences of  $Al_2SSeTe$ ,  $Al_2STeSe$ ,  $Al_2SeSTe$ ,  $Al_2TeSSe$ , and  $Al_2TeSeS$  monolayers. (The light blue and yellow represent the electron depletion and electron accumulation in the surface of  $0.005 e/\text{\AA}^3$ , respectively. The sections of electron density clouds are also represented.)

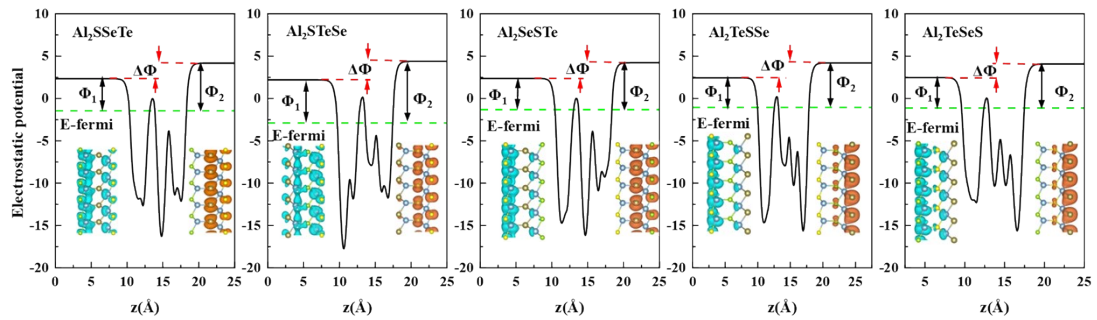

**Figure S5.** Plane-averaged electrostatic potential and partial charge density of  $Al_2SSeTe$ ,  $Al_2STeSe$ ,  $Al_2SeSTe$ ,  $Al_2TeSSe$ , and  $Al_2TeSeS$  monolayers.

**Table S1.** The in-plane/out-plane piezoelectric stress coefficients  $e_{11}/e_{31}$ , in-plane/out-of-plane piezoelectric coefficient  $d_{11}/d_{31}$  of  $Al_2XYZ$  ( $X/Y/Z = S, Se, Te, X \neq Y \neq Z$ ) monolayers.

|                           | $e_{11}(10^{-10}\text{C/m})$ | $e_{31}(10^{-10}\text{C/m})$ | $d_{11}(\text{pm/V})$ | $d_{31}(\text{pm/V})$ |
|---------------------------|------------------------------|------------------------------|-----------------------|-----------------------|
| $\text{Al}_2\text{SSeTe}$ | 2.71                         | 0.39                         | 3.93                  | 0.28                  |
| $\text{Al}_2\text{STeSe}$ | 2.12                         | 0.39                         | 3.46                  | 0.32                  |
| $\text{Al}_2\text{SeSTe}$ | 12.22                        | 0.21                         | 19.24                 | 0.16                  |
| $\text{Al}_2\text{SeTeS}$ | 10.00                        | 0.07                         | 41.28                 | 0.07                  |
| $\text{Al}_2\text{TeSSe}$ | 5.89                         | 0.26                         | 11.18                 | 0.21                  |
| $\text{Al}_2\text{TeSeS}$ | 11.82                        | 0.15                         | 29.85                 | 0.14                  |

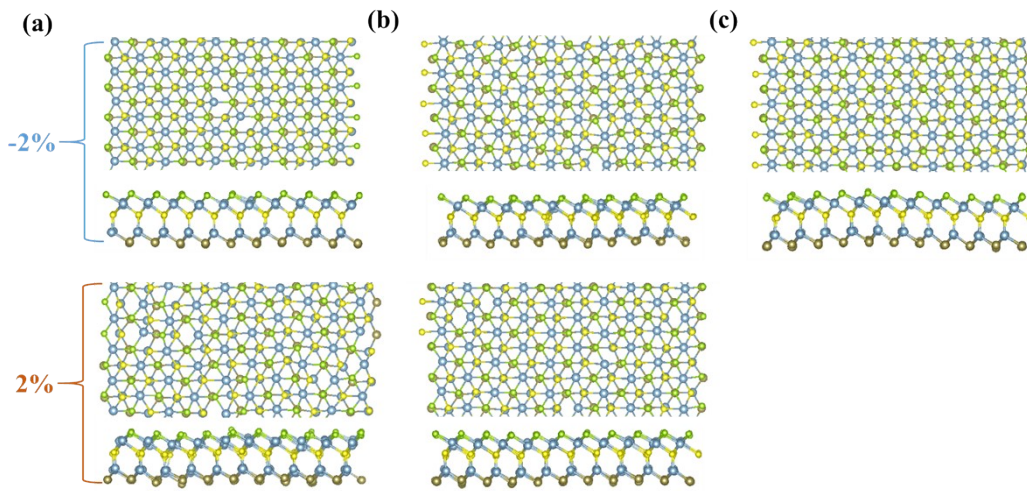

**Figure S6.** Top and side views of the snapshots of  $\text{Al}_2\text{SeTeS}$  monolayer at 2% and -2% uniaxial (along (a) the x-axis and (b) y-axis) and (c) biaxial strain taken from *ab initio* molecular dynamics (AIMD) simulation carried out at 300 K for 5 ps.

**Table S2.** The elastic stiffness constants ( $C_{ij}$ ) and piezoelectric coefficients ( $e_{ij}/d_{ij}$ ) in  $\text{Al}_2\text{SeTeS}$  monolayer under the effect of uniaxial strains along the x-direction.

| $\text{Al}_2\text{STeSe}(x)$ | $E_g(\text{eV})/x$ | $C_{11}(\text{N/m})$ | $C_{12}(\text{N/m})$ | $e_{11}(10^{-10}\text{C/m})$ | $e_{31}(10^{-10}\text{C/m})$ | $d_{11}(\text{pm/V})$ | $d_{31}(\text{pm/V})$ |
|------------------------------|--------------------|----------------------|----------------------|------------------------------|------------------------------|-----------------------|-----------------------|
| -2%                          | 1.65(ID)           | 89.48                | 33.60                | 2.46                         | 0.22                         | 4.40                  | 0.18                  |
| -1.5%                        | 1.71(ID)           | 85.03                | 35.77                | 4.07                         | 0.20                         | 8.26                  | 0.17                  |
| -1%                          | 1.79(ID)           | 81.10                | 37.39                | 5.31                         | 0.19                         | 12.15                 | 0.16                  |
| -0.5%                        | 1.83(D)            | 71.57                | 41.72                | 8.61                         | 0.08                         | 28.86                 | 0.07                  |
| 0%                           | 2.14(ID)           | 67.34                | 43.11                | 10.00                        | 0.07                         | 41.27                 | 0.06                  |
| 0.5%                         | 1.87(ID)           | 61.89                | 44.35                | 11.84                        | 0.04                         | 67.51                 | 0.04                  |
| 1%                           | 1.86(ID)           | 51.87                | 46.46                | 14.61                        | 0.15                         | 270.04                | 0.15                  |
| 1.5%                         | 1.83(ID)           | 48.53                | 44.81                | 15.10                        | 0.22                         | 405.63                | 0.24                  |
| 2%                           | 1.82(ID)           | 48.04                | 41.88                | 14.61                        | 0.23                         | 237.52                | 0.25                  |

**Table S3.** The elastic stiffness constants ( $C_{ij}$ ) and piezoelectric coefficients ( $e_{ij}/d_{ij}$ ) in

*Al<sub>2</sub>SeTeS monolayer under the effect of uniaxial strains along the y-direction.*

| Al <sub>2</sub> STeSe(y) | E <sub>g</sub> (eV)/y | C <sub>11</sub> (N/m) | C <sub>12</sub> (N/m) | e <sub>11</sub> (10 <sup>-10</sup> C/m) | e <sub>31</sub> (10 <sup>-10</sup> C/m) | d <sub>11</sub> (pm/V) | d <sub>31</sub> (pm/V) |
|--------------------------|-----------------------|-----------------------|-----------------------|-----------------------------------------|-----------------------------------------|------------------------|------------------------|
| -2%                      | 1.73(ID)              | 51.99                 | 40.50                 | 13.98                                   | 0.22                                    | 121.72                 | 0.24                   |
| -1.5%                    | 1.78(ID)              | 50.95                 | 44.18                 | 15.10                                   | 0.22                                    | 222.81                 | 0.23                   |
| -1%                      | 1.82(ID)              | 54.81                 | 45.72                 | 13.77                                   | 0.12                                    | 151.48                 | 0.12                   |
| -0.5%                    | 1.85(ID)              | 61.10                 | 44.71                 | 11.97                                   | 0.02                                    | 73.05                  | 0.02                   |
| 0%                       | 2.14(ID)              | 67.34                 | 43.11                 | 10.00                                   | 0.07                                    | 41.27                  | 0.06                   |
| 0.5%                     | 1.86(D)               | 68.92                 | 42.49                 | 9.10                                    | 0.08                                    | 34.45                  | 0.07                   |
| 1%                       | 1.83(ID)              | 76.93                 | 38.82                 | 6.39                                    | 0.18                                    | 16.76                  | 0.16                   |
| 1.5%                     | 1.79(ID)              | 81.42                 | 36.42                 | 4.70                                    | 0.22                                    | 10.45                  | 0.19                   |
| 2%                       | 1.75(D)               | 84.65                 | 33.91                 | 3.21                                    | 0.24                                    | 6.33                   | 0.20                   |

**Table S4.** *The elastic stiffness constants (C<sub>ij</sub>) and piezoelectric coefficients (e<sub>ij</sub>/d<sub>ij</sub>) in Al<sub>2</sub>SeTeS monolayer under the effect of biaxial strains.*

| Al <sub>2</sub> STeSe(xy) | E <sub>g</sub> (eV)/xy | C <sub>11</sub> (N/m) | C <sub>12</sub> (N/m) | e <sub>11</sub> (10 <sup>-10</sup> C/m) | e <sub>31</sub> (10 <sup>-10</sup> C/m) | d <sub>11</sub> (pm/V) | d <sub>31</sub> (pm/V) |
|---------------------------|------------------------|-----------------------|-----------------------|-----------------------------------------|-----------------------------------------|------------------------|------------------------|
| -2%                       | 1.89                   | 84.93                 | 38.74                 | 6.35                                    | 0.10                                    | 13.74                  | 0.08                   |
| -1.5%                     | 1.97                   | 80.72                 | 39.43                 | 7.08                                    | 0.09                                    | 17.14                  | 0.08                   |
| -1%                       | 2.03                   | 76.26                 | 40.45                 | 7.97                                    | 0.08                                    | 22.27                  | 0.07                   |
| -0.5%                     | 2.10                   | 71.88                 | 41.52                 | 8.86                                    | 0.07                                    | 29.18                  | 0.07                   |
| 0%                        | 2.14                   | 67.34                 | 43.11                 | 10.00                                   | 0.07                                    | 41.28                  | 0.06                   |
| 0.5%                      | 2.13                   | 62.37                 | 44.79                 | 11.16                                   | 0.06                                    | 63.48                  | 0.06                   |
| 1%                        | 2.11                   | 57.69                 | 46.46                 | 12.33                                   | 0.05                                    | 109.82                 | 0.05                   |
| 1.5%                      | 2.09                   | 52.47                 | 48.78                 | 13.77                                   | 0.05                                    | 373.13                 | 0.05                   |
| 2%                        | 2.07                   | 47.88                 | 50.55                 | -                                       | -                                       | -                      | -                      |

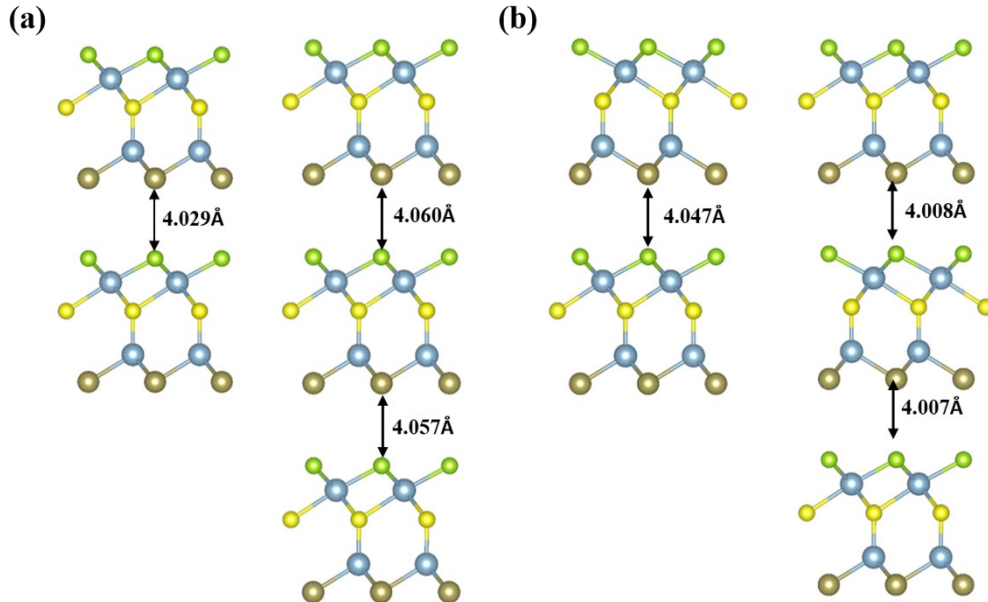

**Figure S7.** *The 2D Al<sub>2</sub>SeTeS multilayer structure of two-layer, three-layer Al<sub>2</sub>SeTeS monolayer stacked in AA (a) and AB (b) mode.*

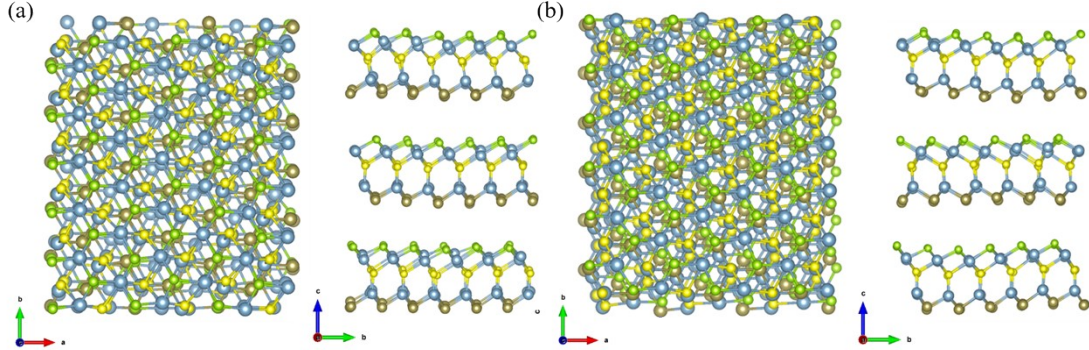

**Figure S8.** Top and side views of the snapshots of three-layer  $Al_2SeTeS$  monolayer stacked in (a) AA and (b) AB mode taken from *ab initio* molecular dynamics (AIMD) simulation carried out at 300 K for 5 ps.

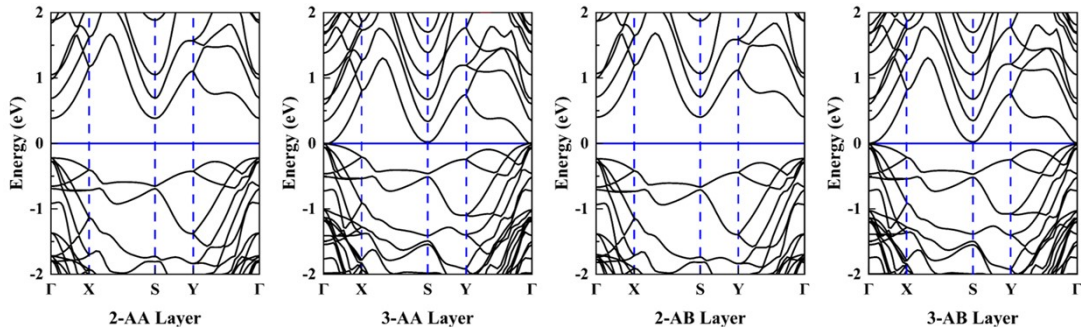

**Figure S9.** The band of two-layer and three-layer  $Al_2SeTeS$  stacked in AA and AB mode.

**Table S5.** The formation energies ( $E_f$ ), band gap ( $E_g$ ), elastic stiffness constants ( $C_{ij}$ ) and piezoelectric coefficients ( $e_{ij}/d_{ij}$ ) in two-layer, three-layer  $Al_2SeTeS$  stacked in AA and AB mode.

| $Al_2SeTeS$ |   | $E_f$ (eV) | $E_g$ (eV) | $C_{11}$ (N/m) | $C_{12}$ (N/m) | $e_{11}$ ( $10^{-10}$ C/m) | $e_{31}$ ( $10^{-10}$ C/m) | $d_{11}$ (pm/V) | $d_{31}$ (pm/V) |
|-------------|---|------------|------------|----------------|----------------|----------------------------|----------------------------|-----------------|-----------------|
| AA          | 2 | -0.35      | 0.60(D)    | 118.91         | 68.44          | 13.74                      | 0.05                       | 27.23           | 0.028           |
|             | 3 | -0.73      | 0.05(D)    | 117.56         | 71.93          | 18.14                      | 0.21                       | 39.75           | 0.11            |
| AB          | 2 | -0.35      | 0.63(D)    | 126.14         | 69.58          | 0.15                       | 0.87                       | 0.27            | 0.44            |
|             | 3 | -0.74      | 0.08(D)    | 140.44         | 81.36          | 3.51                       | 0.59                       | 5.95            | 0.27            |
